# Supplementary material for: LCO Receptors Involved in Arbuscular Mycorrhiza Are Functional for Rhizobia Perception in Legumes
Source: PubMed Central journal article supplement (PMC6926482; doi:10.1016/j.cub.2019.11.038), 2019-12-16
Supplement: mmc1.pdf [file mmc1.pdf]

**Supplemental Information**

**LCO Receptors Involved in Arbuscular Mycorrhiza  
Are Functional for Rhizobia Perception in Legumes**

**Ariane Girardin, Tongming Wang, Yi Ding, Jean Keller, Luis Buendia, Mégane Gaston, Camille Ribeyre, Virginie Gascioli, Marie-Christine Auriac, Tatiana Vernié, Abdelhafid Bendahmane, Martina Katharina Ried, Martin Parniske, Patrice Morel, Michiel Vandenbussche, Martine Schorderet, Didier Reinhardt, Pierre-Marc Delaux, Jean-Jacques Bono, and Benoit Lefebvre**

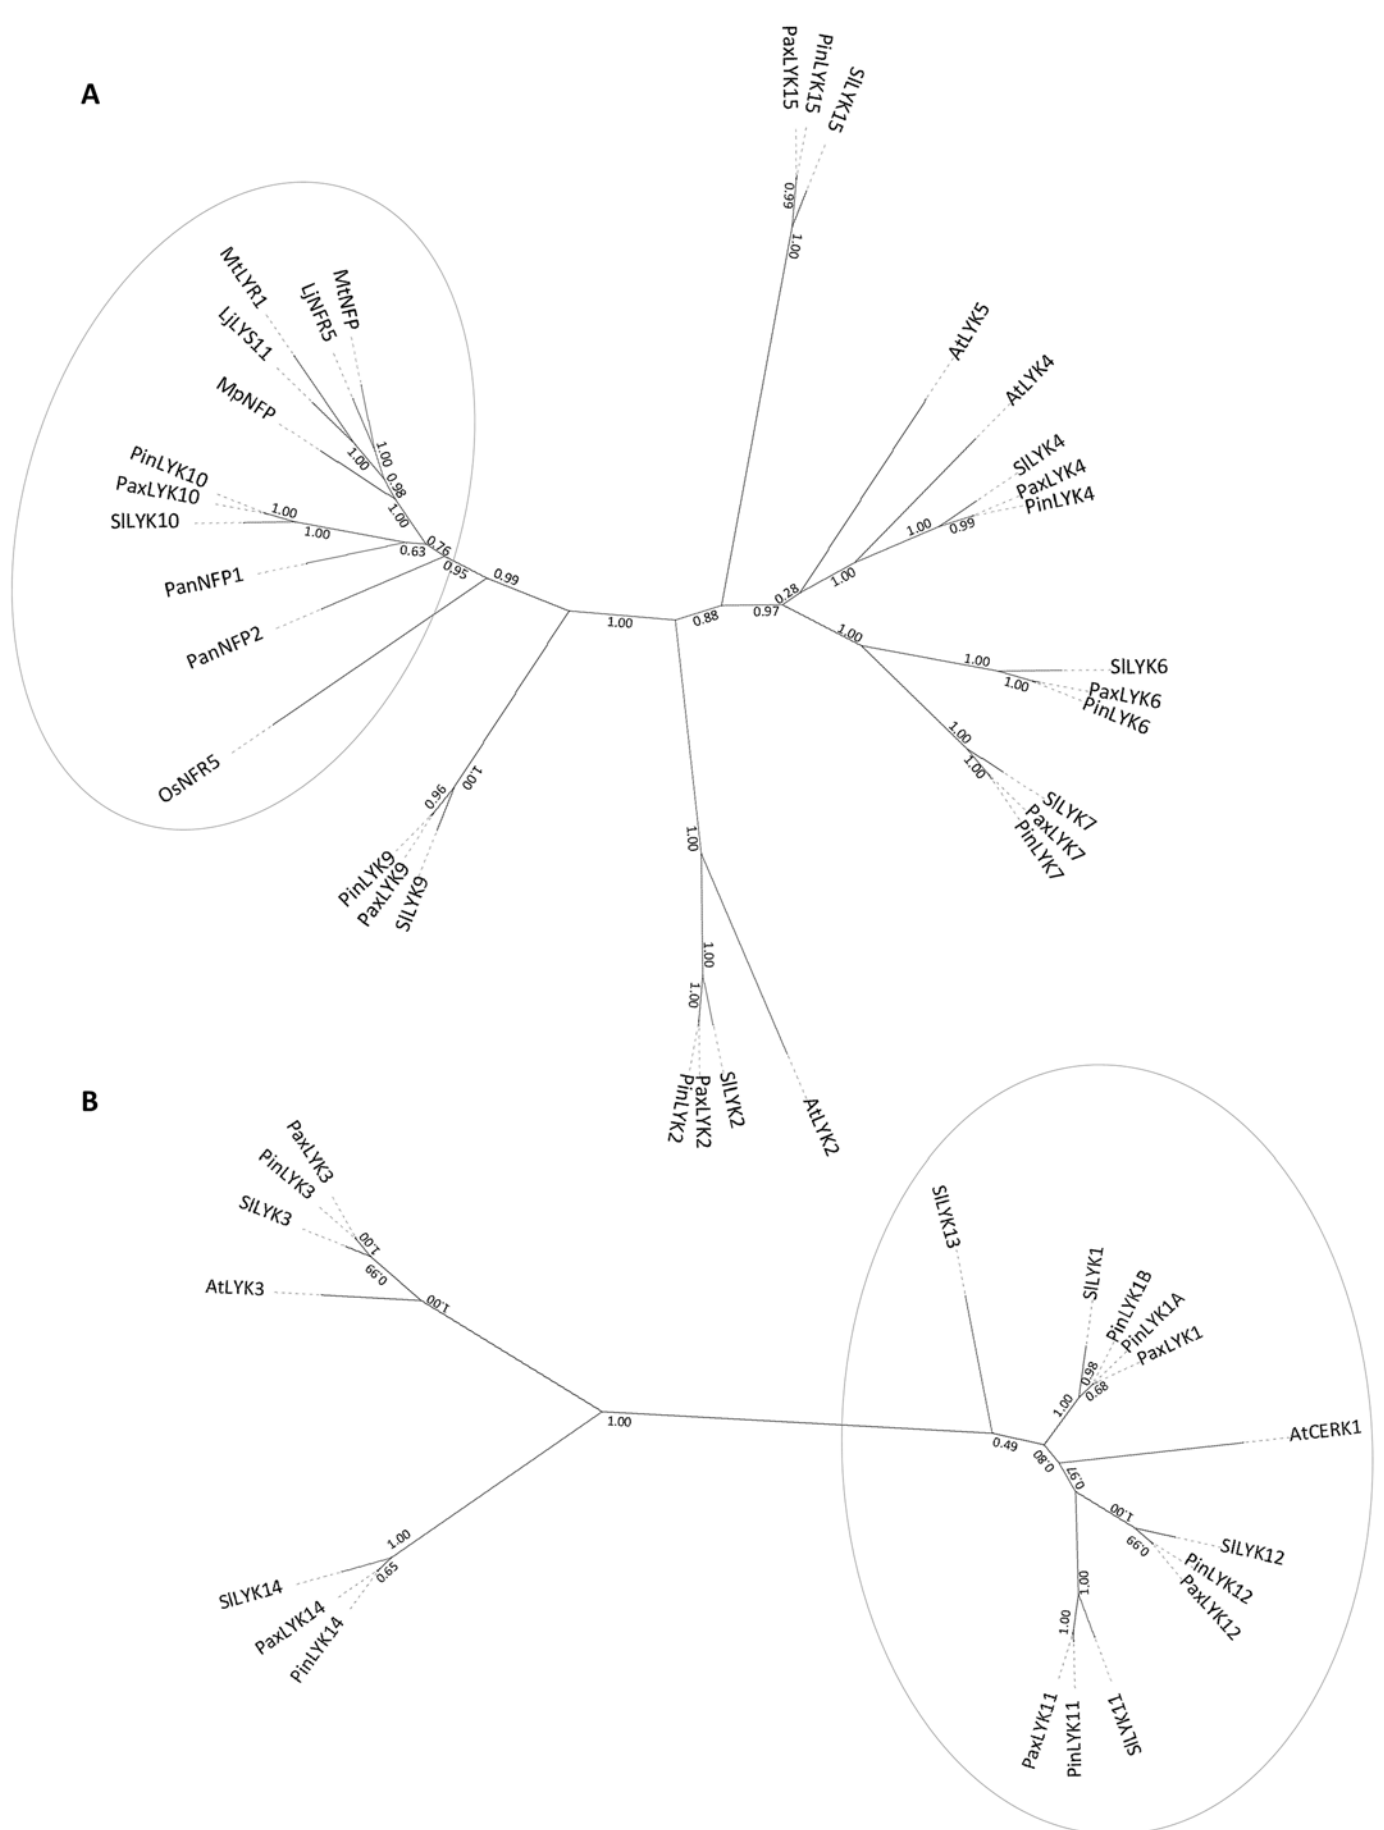

**Figure S1 Phylogenetic trees of LYR and LYK LysM-RLKs. Related to Figures 1 and 2.** Full length amino acid sequences of all LYRs, predicted to contain inactive kinase domains (A) or LYKs, predicted to contain active kinase domains (B) from *Petunia axillaris* (Pax), *Petunia inflata* (Pin), *Solanum lycopersicum* (Si) and *Arabidopsis thaliana* (At) were used to construct phylogenetic trees. Accession numbers of *P. axillaris* and *P. inflata* LysM-RLKs can be found in table S1. Members of the phylogenetic group LYRIA (A, circled) from *Medicago truncatula* (Mt), *Lotus japonicus* (Lj), *Mimosa pudica* (Mp), *Parasponia andersonii* (Pan) and *Oryza sativa* (Os) were added. SiLYK8 was not included because it has a truncated kinase. The phylogenetic group LYK1 containing AtCERK1 and SiLYK12 is circled (B). Numbers at the branches correspond to approximate likelihood values.

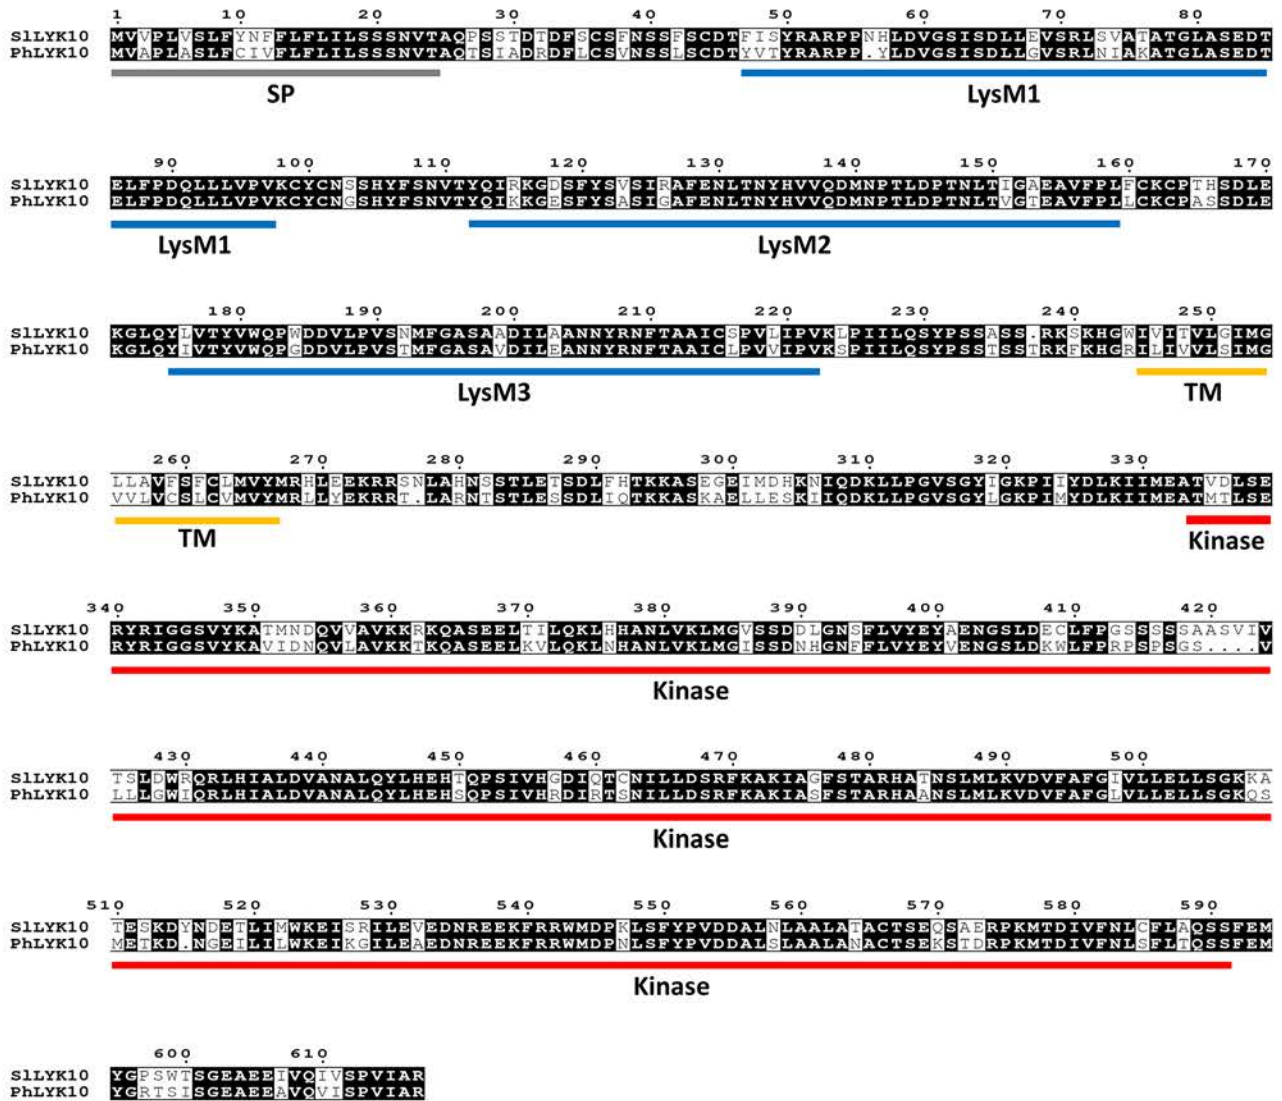

**Figure S2 Sequence alignment and annotation of PhLYK10 and Silyk10. Related to Figures 1 and 2.** *PhLYK10* in *Petunia hybrida* originates from the *Petunia axillaris* parent. *PhLYK10* has 79% amino acid identity compared to *Silyk10*.

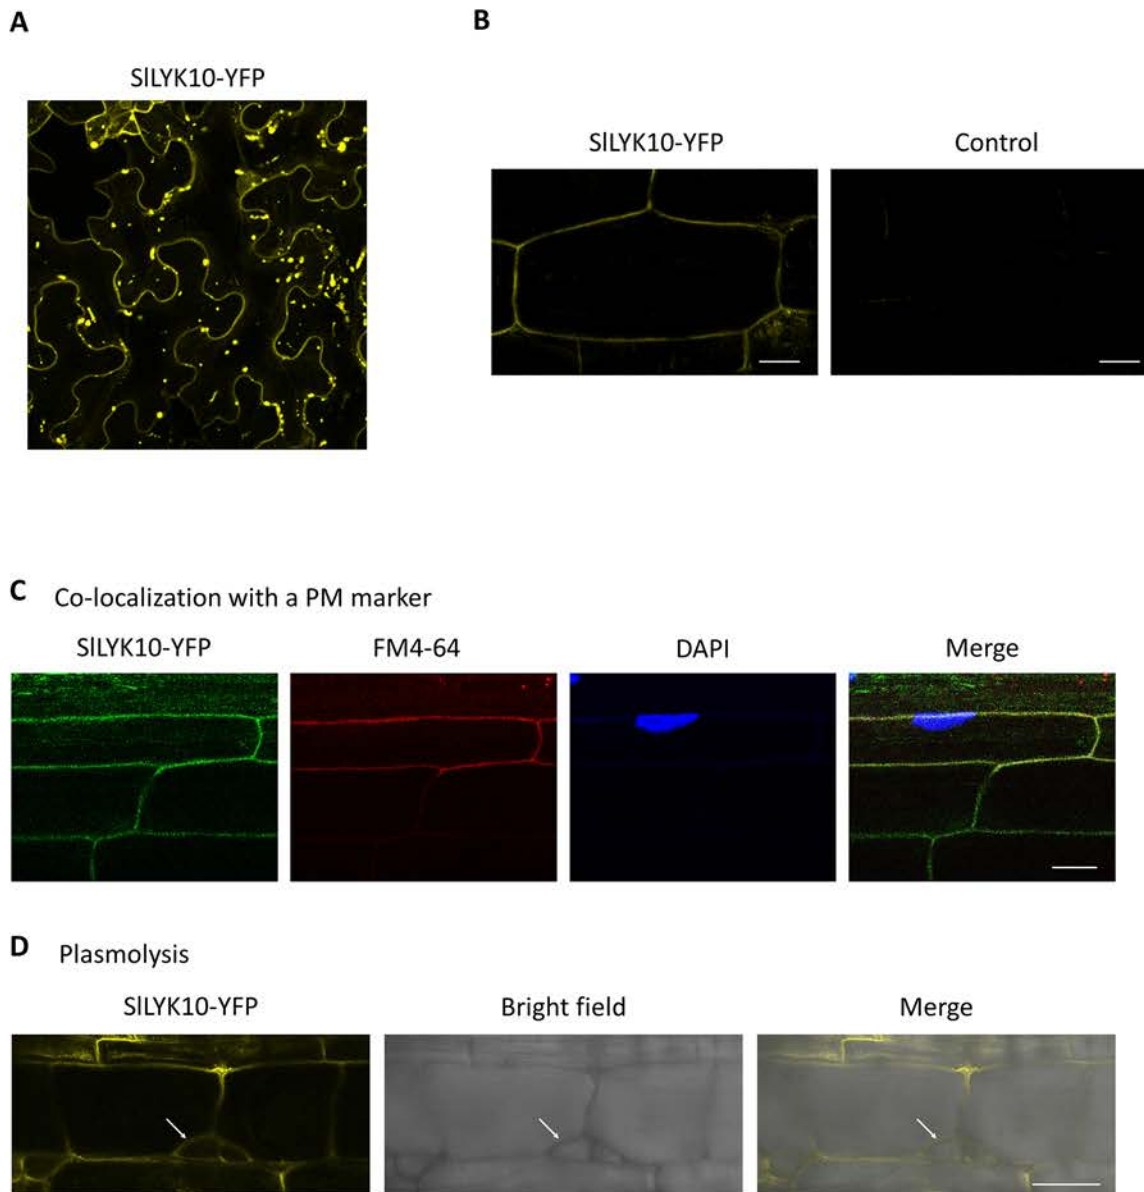

**Figure S3 Subcellular localization of SILYK10-YFP in *N. benthamiana* leaves and tomato roots. Related to Figure 3.** A) Confocal images of epidermal cells from a *N. benthamiana* leaf expressing SILYK10-YFP and showing localization partly in undefined compartments. B) Confocal images of epidermal cells from a tomato ROC line expressing SILYK10-YFP or a ROC control. Images were acquired with similar microscope settings. C) Confocal images of epidermal cells from a tomato ROC line expressing SILYK10-YFP and treated with FM4-64 (which labels the plasma membrane (PM) before being internalized) and DAPI (which labels the nucleus), showing that SILYK10-YFP is localized at the PM. D) Confocal images of epidermal cells from a tomato ROC line expressing SILYK10-YFP and plasmolyzed with mannitol. The arrow points to detachment of the PM from the cell wall. Scale bars represent 20  $\mu\text{m}$  in A, 50  $\mu\text{m}$  in B and 10  $\mu\text{m}$  in C.

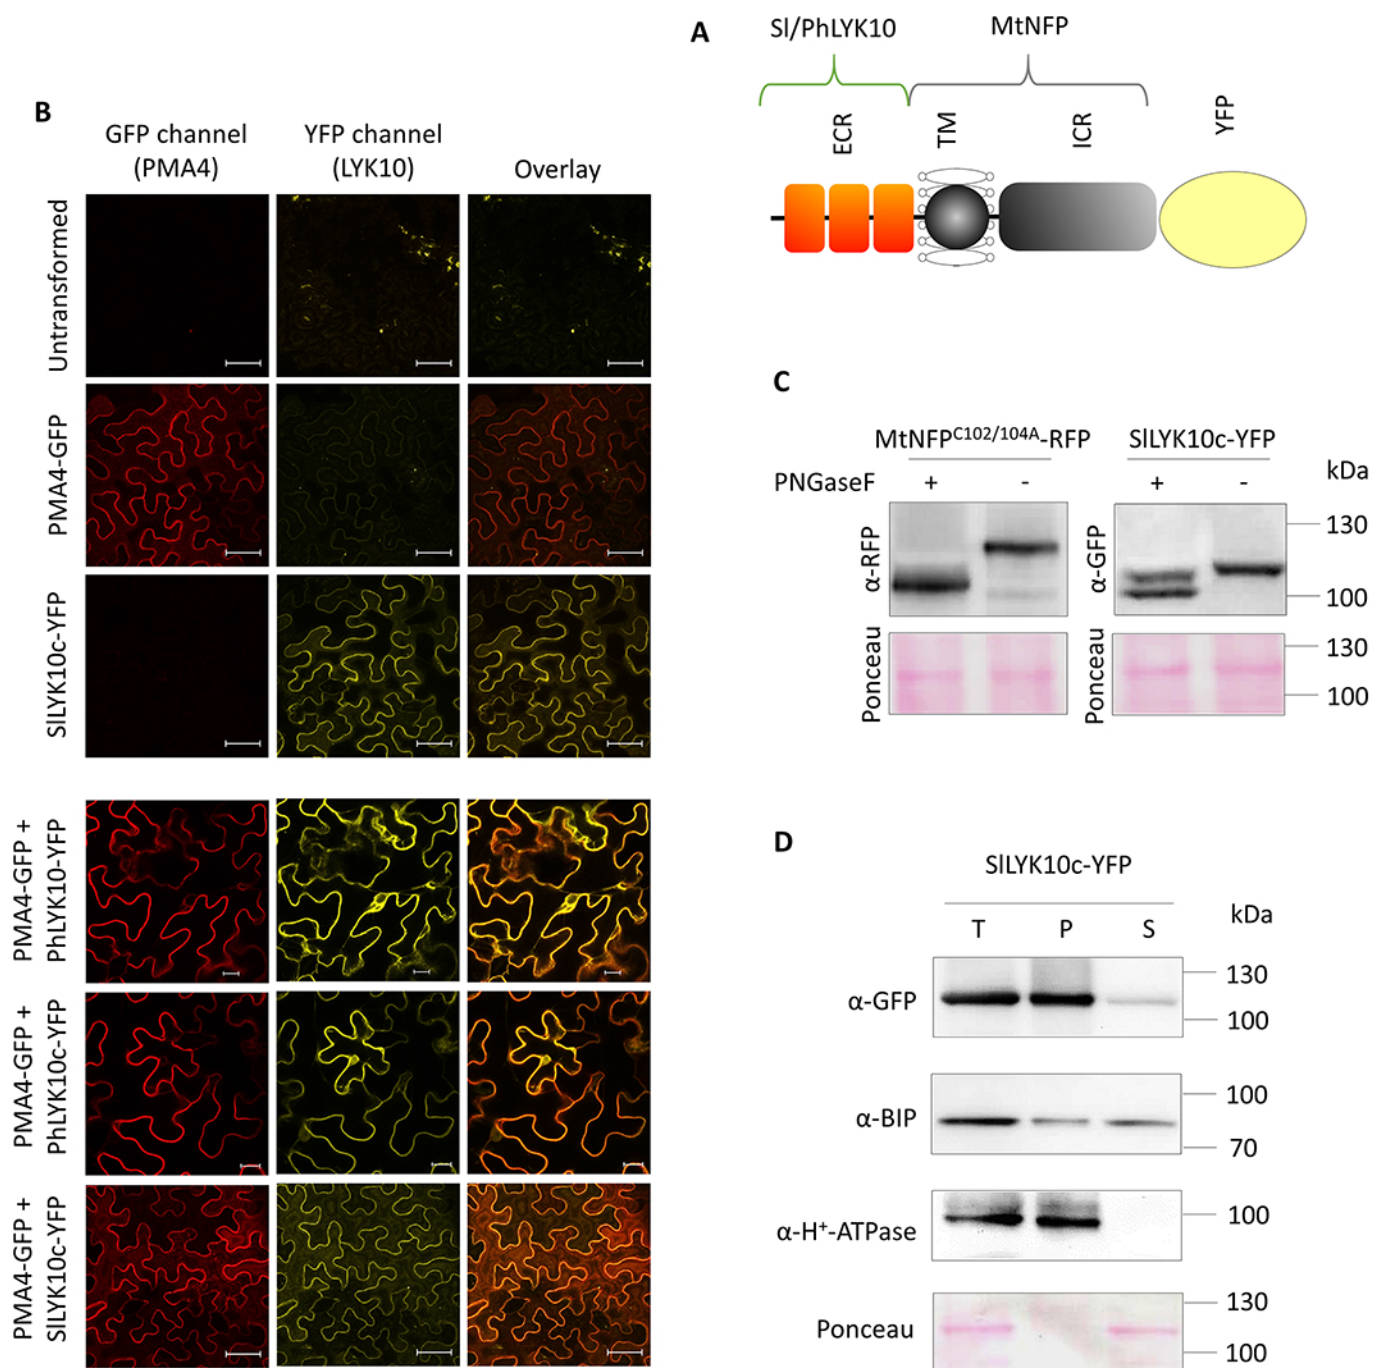

**Figure S4 Subcellular localization of SILYK10c-YFP in *N. benthamiana* leaves. Related to Figure 3.** A) Schematic view of the chimeric LYK10c-YFP constructs: the extracellular region (ECR) composed of 3 Lysin Motifs from SILYK10 or PhLYK10, the transmembrane domain (TM), the intracellular region (ICR) from MtNFP and the yellow fluorescent protein (YFP). B) Co-localization in *N. benthamiana* leaves of PhLYK10-YFP, PhLYK10c-YFP and SILYK10c-YFP with a plasma membrane (PM) marker. Confocal images of epidermal cells from *N. benthamiana* leaves expressing combinations of PMA4-GFP, a PM marker with PhLYK10-YFP, PhLYK10-YFPc or SILYK10c-YFP. Fluorescence detected in the GFP and YFP channels is shown in red and yellow respectively, to facilitate visualization of the overlay. Bars represent 20  $\mu$ m. C) Sensitivity assay of SILYK10c to PNGaseF. After been processed in the Golgi apparatus, protein N-glycans become insensitive to digestion by PNGaseF. Proteins extracted from *N. benthamiana* leaves were incubated (+) or not (-) with PNGaseF. A higher band after incubation indicates that protein N-glycans are insensitive to the PNGaseF and shows that protein has left the ER. A lower band after incubation indicates that protein N-glycans are sensitive to the PNGaseF digestion and shows that protein did not exit the ER. The mutated form of MtNFP lacking disulfide bridges is retained in the ER [S1] and completely digested by PNGaseF. D) Cell fractionation of leaves expressing SILYK10c-YFP. Proteins were immunodetected in the total extract (T), the 100,000g pellet (P) and the supernatant (S) using anti-GFP antibodies (to detect the YFP fusions), anti-BIP antibodies (to detect an ER marker) or anti-H<sup>+</sup>-ATPase antibodies (to detect a PM marker). The Ponceau staining shows that equal amounts of proteins were loaded on the gel.

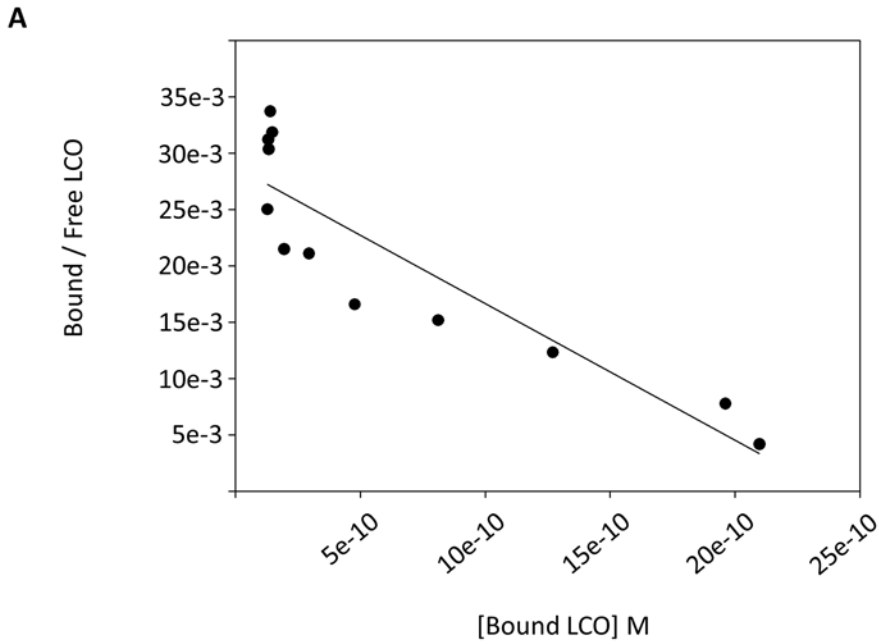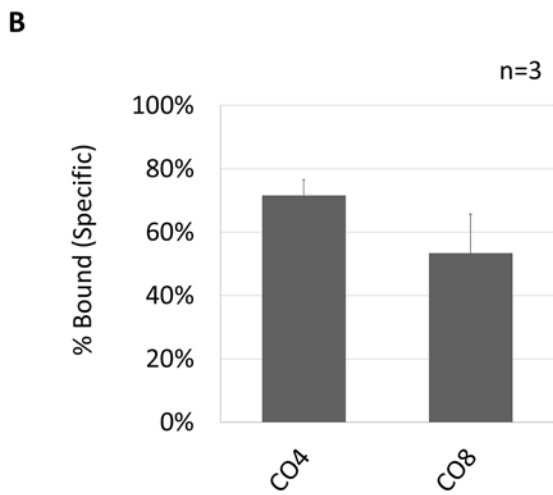

**Figure S5 Affinity for LCOs and selectivity for LCOs versus COs of PhLYK10c. Related to Figure 3.** A) Scatchard plot analysis of a cold saturation experiment using LCO-V(C18:1,NMe,S) and a membrane fraction containing PhLYK10c-YFP. B) Selectivity of the PhLYK10c LCO binding site for various CO structures. Membrane fraction containing PhLYK10c-YFP was incubated with radiolabeled LCO-V(C18:1,NMe-<sup>35</sup>S) in the presence of 1  $\mu$ M of the indicated unlabeled COs used as competitors. Non-specific binding was determined in the presence of 1  $\mu$ M LCO-V(C18:1,NMe,S). Bars represent the percentage of specific binding (means and standard deviations) obtained with independent batches of membrane fractions.

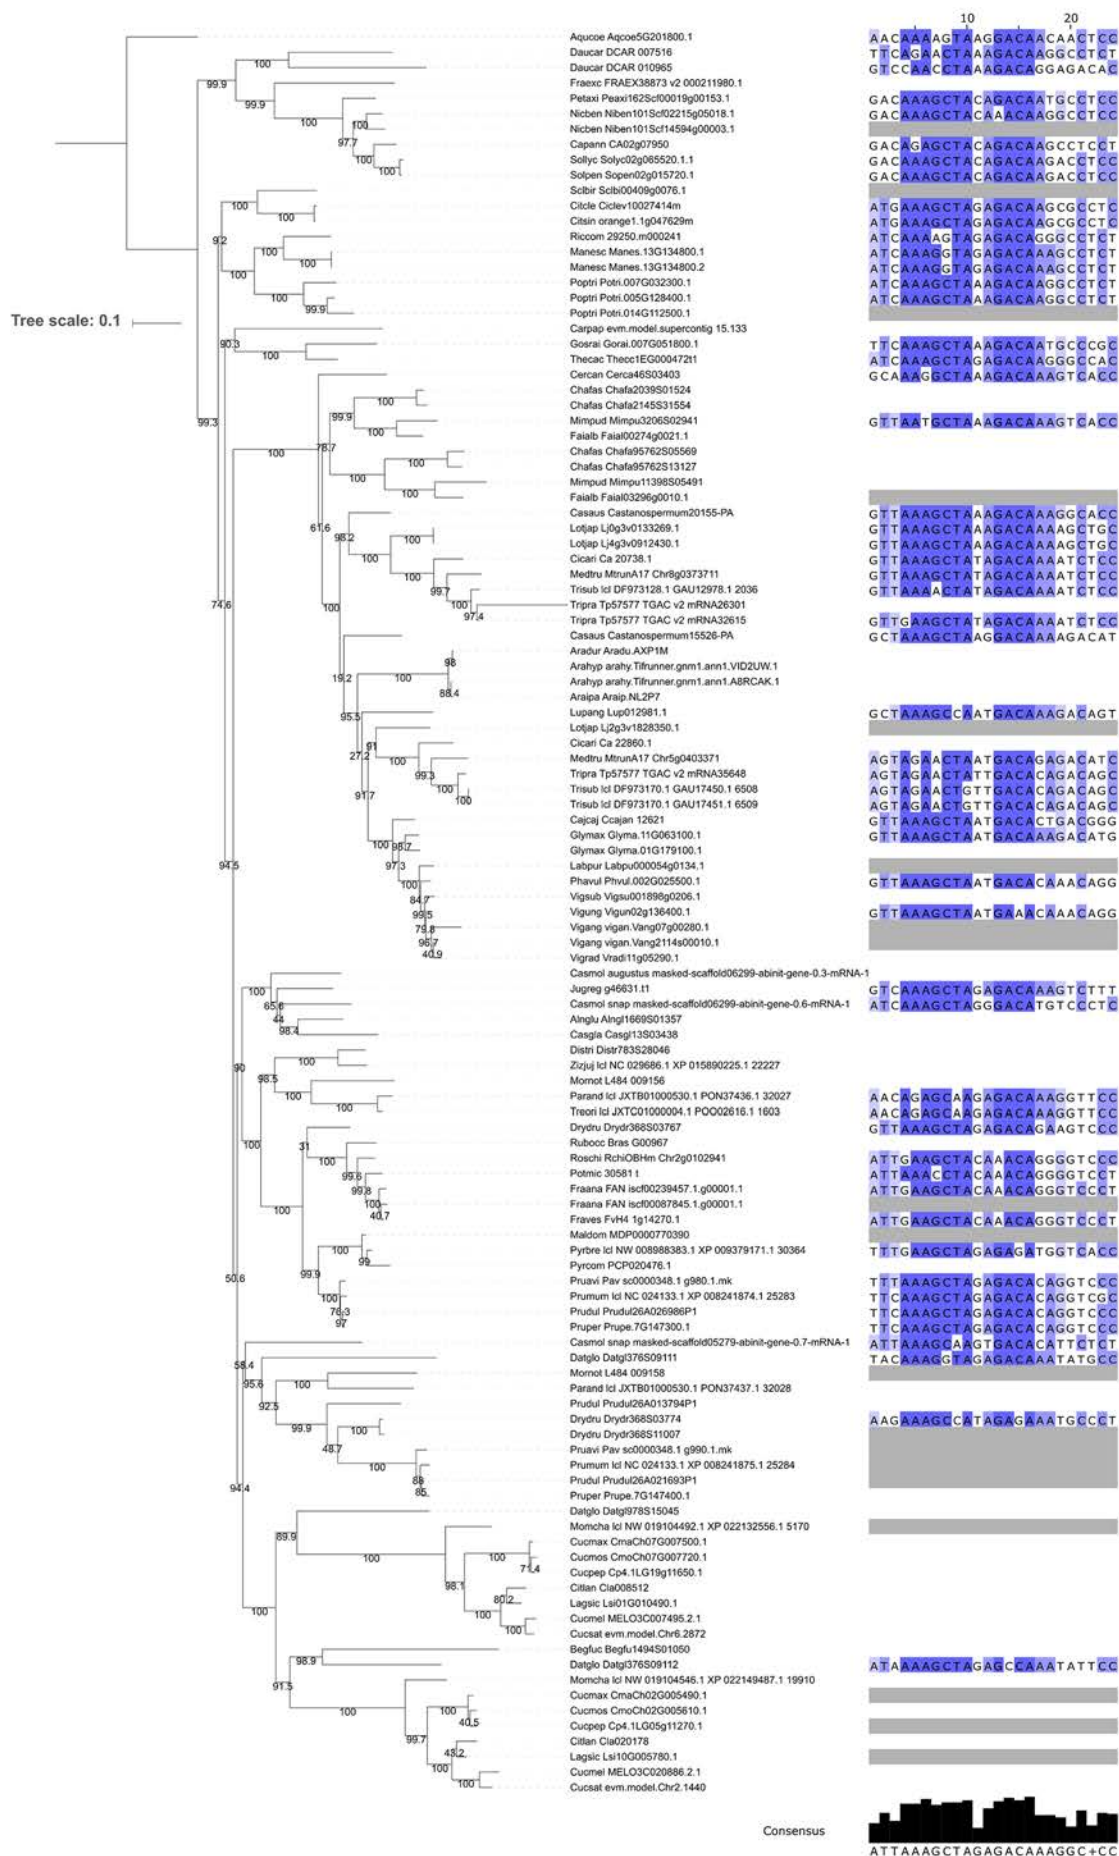

**Figure S6 Alignment of the putative *cis*-regulating element in *LYRIA* promoters of 71 dicotyledonous species. Related to Figure 5.** The tree has been rooted on the basal dicots *Aquilegia coerulea*. Branch support (10,000 replicates of SH-aLRT) is indicated on each branch. Alignment of the putative *cis*-regulating element has been mapped at the right of the tree. Identity percentage is represented by the blue gradient background at each position. Grey and white rectangles indicates that no promoter sequences were extracted for these genes or absence of the motif respectively. Details about the 71 species are given in Table S2.

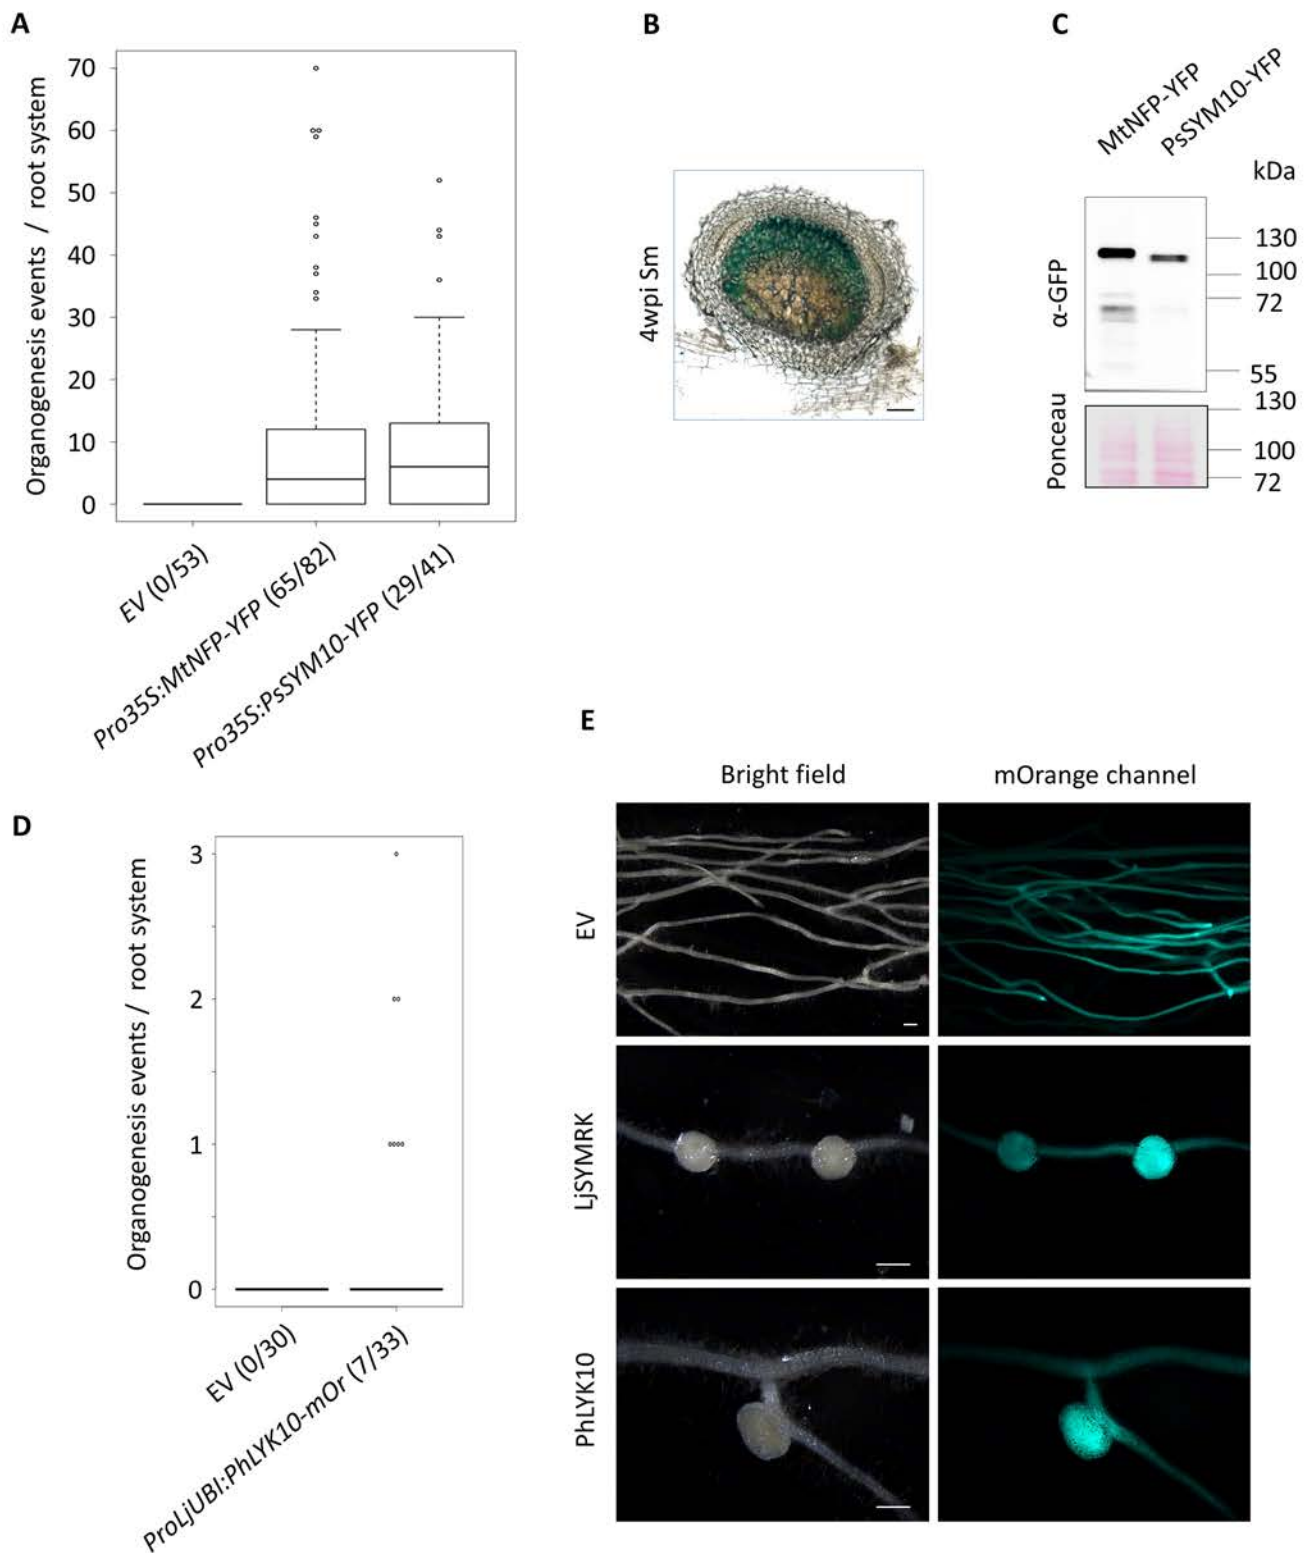

**Figure S7** Complementation of *Mtnfp* nodulation by *Pro35S:PsSYM10-YFP* and spontaneous nodulation in *L. japonicus* roots expressing *ProLjUbi:PhLYK10-Orange*. Related to Figure 6. A) Number of organogenesis events (nodules and nodule primordia) 28 dpi with *S. meliloti lacZ* in *Mtnfp* roots transformed with the indicated constructs. Numbers in brackets indicate the numbers of root systems carrying organogenesis events / root systems analyzed. Box plots represent the distribution between individuals from at least 2 independent experiments. Data for the empty vector (EV) and *Pro35S:MtNFP-YFP* are the same as in Figure 6A. B) Section of a nodule from roots expressing *PsSYM10*. *S. meliloti LacZ* were stained by X-Gal. Scale bar represents 100  $\mu$ m. C) Immunodetection in 20 mg of roots (10 root systems were pooled) expressing the indicated YFP-fusion proteins. D) Roots of *L. japonicus* Gifu wild-type were transformed with the indicated constructs. Box plots represent the number of spontaneous organogenesis events. E) Pictures of spontaneous nodules on *L. japonicus* Gifu roots transformed with EV, *ProLjUbi:LjSYMRK-mOrange* or *ProLjUbi:PhLYK10-mOrange*, 60 days post transformation. Scale bars represent 1 mm.



| Subfamily               | <i>Petunia axillaris</i> | Short name              | <i>Petunia inflata</i>  | Short name              | tomato ortholog |         |
|-------------------------|--------------------------|-------------------------|-------------------------|-------------------------|-----------------|---------|
| LYR                     | Peaxi162Scf00019g00153   | PaxLYK10                | Peinf101Scf00925g10002  | PinLYK10                | SILYK10         |         |
|                         | Peaxi162Scf01416g00014   | PaxLYK9                 | Peinf101Scf00428g04012  | PinLYK9                 | SILYK9          |         |
|                         | x                        |                         | x                       |                         | SILYK8          |         |
|                         | Peaxi162Scf00420g00445   | PaxLYK2                 | Peinf101Scf01192g06044  | PinLYK2                 | SILYK2          |         |
|                         | Peaxi162Scf00948g00026   | PaxLYK15                | Peinf101Scf03917g00010  | PinLYK15                | SILYK15         |         |
|                         | Peaxi162Scf00535g00125*  | PaxLYK4                 | Peinf101Scf00359g10025* | PinLYK4                 | SILYK4          |         |
|                         | Peaxi162Scf00535g00125*  | PaxLYK7                 | Peinf101Scf00359g10025* | PinLYK7                 | SILYK7          |         |
|                         | Peaxi162Scf00064g00036   | PaxLYK6                 | Peinf101Scf00471g16004  | PinLYK6                 | SILYK6          |         |
|                         | LYK                      | Peaxi162Scf00921g00021  | PaxLYK1                 | Peinf101Scf01180g09048* | PinLYK1A        | SILYK1  |
|                         |                          | x                       |                         | Peinf101Scf01180g09048* | PinLYK1B        | SILYK1  |
|                         |                          | x                       |                         | x                       |                 | SILYK13 |
|                         |                          | Peaxi162Scf00178g00310* | PaxLYK12                | Peinf101Scf00005g00016* | PinLYK12        | SILYK12 |
| Peaxi162Scf00178g00310* |                          | PaxLYK11                | Peinf101Scf00005g00016* | PinLYK11                | SILYK11         |         |
| Peaxi162Scf00013g00053  |                          | PaxLYK14                | Peinf101Scf00500g06038  | PinLYK14                | SILYK14         |         |
| Peaxi162Scf00038g01033  |                          | PaxLYK3                 | Peinf101Scf02312g02018  | PinLYK3                 | SILYK3          |         |

**Table S1 LysM-RLKs in *Petunia axillaris* and *Petunia inflata* genomes. Related to Figure 2.**

\* Genes in tandem for which the gene model predicts only one gene.

| Species                                               | Order        | Family         | Abbreviation | Reference                    | RNS | AM |
|-------------------------------------------------------|--------------|----------------|--------------|------------------------------|-----|----|
| <i>Alnus glutinosa</i>                                | Fagales      | Betulaceae     | Alnglu       | 10.1126/science.aat1743      | 1   | 1  |
| <i>Aquilegia coerulea</i>                             | Ranunculales | Ranunculaceae  | Aqucoe       | 10.7554/eLife.36426          | 0   | ND |
| <i>Arachis duranensis</i>                             | Fabales      | Fabaceae       | Aradur       | 10.1038/ng.3517              | 1   | 1  |
| <i>Arachis hypogaea</i>                               | Fabales      | Fabaceae       | Arahyp       | peanutbase.org               | 1   | 1  |
| <i>Arachis ipaensis</i>                               | Fabales      | Fabaceae       | Araipa       | 10.1038/ng.3517              | 1   | 1  |
| <i>Begonia fuchsioides</i>                            | Cucurbitales | Begoniaceae    | Begfuc       | 10.1126/science.aat1743      | 0   | 1  |
| <i>Cajanus cajan</i>                                  | Fabales      | Fabaceae       | Cajcaj       | 10.1038/nbt.2022.            | 1   | 1  |
| <i>Capsicum annuum</i> cvCM334                        | Solanales    | Solanaceae     | Capann       | 10.1038/ng.2877              | 0   | 1  |
| <i>Carica papaya</i>                                  | Brassicales  | Caricaceae     | Carpap       | 10.1038/nature06856          | 0   | 1  |
| <i>Castanea mollissima</i>                            | Fagales      | Fagaceae       | Casmol       | www.hardwoodgenomics.org     | 0   | 1  |
| <i>Castanospermum australe</i>                        | Fabales      | Fabaceae       | Casaus       | 10.1126/science.aat1743      | 0   | 1  |
| <i>Casuarina glauca</i>                               | Fagales      | Casuarinaceae  | Casgla       | 10.1126/science.aat1743      | 1   | 1  |
| <i>Cercis canadensis</i>                              | Fabales      | Caesalpinaceae | Cercan       | 10.1126/science.aat1743      | 0   | 1  |
| <i>Chamaecrista fasciculata</i>                       | Fabales      | Fabaceae       | Chafas       | 10.1126/science.aat1743      | 1   | 1  |
| <i>Cicer arietinum</i> ICC4958                        | Fabales      | Fabaceae       | Cicari       | 10.1038/srep12806            | 1   | 1  |
| <i>Citrullus lanatus</i> subsp. <i>vulgaris</i> 97103 | Cucurbitales | Cucurbitaceae  | Citlan       | 10.1038/ng.2470              | 0   | 1  |
| <i>Citrus dementina</i>                               | Sapindales   | Rutaceae       | Citcle       | 10.1038/nbt.2906             | 0   | 1  |
| <i>Citrus sinensis</i>                                | Sapindales   | Rutaceae       | Citsin       | 10.1038/nbt.2906             | 0   | 1  |
| <i>Cucumis melo</i>                                   | Cucurbitales | Cucurbitaceae  | Cucmel       | 10.1073/pnas.1205415109      | 0   | 1  |
| <i>Cucumis sativus</i> P183967                        | Cucurbitales | Cucurbitaceae  | Cucsat       | 10.1038/ng.2801              | 0   | 1  |
| <i>Cucurbita maxima</i>                               | Cucurbitales | Cucurbitaceae  | Cucmax       | 10.1016/j.molp.2017.09.003   | 0   | 1  |
| <i>Cucurbita moschata</i>                             | Cucurbitales | Cucurbitaceae  | Cucmos       | 10.1016/j.molp.2017.09.004   | 0   | 1  |
| <i>Cucurbita pepo</i>                                 | Cucurbitales | Cucurbitaceae  | Cucpep       | http://cucurbitgenomics.org  | 0   | 1  |
| <i>Datisca glomerata</i>                              | Cucurbitales | Dasticeae      | Datglo       | 10.1126/science.aat1743      | 1   | 1  |
| <i>Daucus carota</i>                                  | Apiales      | Apiaceae       | Daucar       | 10.1038/ng.3565              | 0   | 1  |
| <i>Discaria trinervis</i>                             | Rosales      | Rhamnaceae     | Distri       | 10.1126/science.aat1743      | 1   | 1  |
| <i>Dryas drummondii</i>                               | Rosales      | Rosaceae       | Drydru       | 10.1126/science.aat1743      | 1   | 1  |
| <i>Faidherbia albida</i>                              | Fabales      | Fabaceae       | Faialb       | 10.1093/gigascience/giy152   | 1   | 1  |
| <i>Fragaria vesca</i>                                 | Rosales      | Rosaceae       | Fraves       | 10.1093/gigascience/gix124   | 0   | 1  |
| <i>Fragaria x ananassa</i>                            | Rosales      | Rosaceae       | Fraana       | www.rosaceae.org             | 0   | 1  |
| <i>Fraxinus excelsior</i>                             | Lamiales     | Oleaceae       | Fraexc       | 10.1038/nature20786          | 0   | 1  |
| <i>Glycine max</i>                                    | Fabales      | Fabaceae       | Glymax       | 10.1038/nature08670          | 1   | 1  |
| <i>Gossypium raimondii</i>                            | Malvales     | Malvaceae      | Gosrai       | 10.1038/nature11798          | 0   | 1  |
| <i>Juglans regia</i>                                  | Fagales      | Juglandaceae   | Jugreg       | 10.1111/tpj.13207            | 0   | 1  |
| <i>Lablab purpureus</i>                               | Fabales      | Fabaceae       | Labpur       | 10.1093/gigascience/giy152   | 1   | 1  |
| <i>Lagenaria siceraria</i>                            | Cucurbitales | Cucurbitaceae  | Lagsic       | 10.1111/tpj.13722            | 0   | 1  |
| <i>Lotus japonicus</i>                                | Fabales      | Fabaceae       | Lotjap       | 10.1093/dnares/dsn008        | 1   | 1  |
| <i>Lupinus angustifolius</i>                          | Fabales      | Fabaceae       | Lupang       | 10.1111/pbi.12615            | 1   | 0  |
| <i>Malus domestica</i>                                | Rosales      | Rosaceae       | Maldom       | www.rosaceae.org             | 0   | 1  |
| <i>Manihot esculenta</i>                              | Malpighiales | Euphorbiaceae  | Manesc       | 10.1038/nbt.3535             | 0   | 1  |
| <i>Medicago truncatula</i>                            | Fabales      | Fabaceae       | Medtru       | 10.1038/s41477-018-0286-7    | 1   | 1  |
| <i>Mimosa pudica</i>                                  | Fabales      | Fabaceae       | Mimpud       | 10.1126/science.aat1743      | 1   | 1  |
| <i>Momordica charantia</i>                            | Cucurbitales | Cucurbitaceae  | Momcha       | NCBI                         | 0   | 1  |
| <i>Morus notabilis</i>                                | Rosales      | Moraceae       | Mornot       | 10.1038/ncomms3445           | 0   | 1  |
| <i>Nicotiana benthamiana</i>                          | Solanales    | Solanaceae     | Nicben       | 10.1094/MPMI-06-12-0148-TA   | 0   | 1  |
| <i>Parasponia andersonii</i>                          | Rosales      | Cannabaceae    | Parand       | 10.1073/pnas.1721395115      | 1   | 1  |
| <i>Petunia axillaris</i>                              | Solanales    | Solanaceae     | Petaxi       | 10.1038/nplants.2016.74      | 0   | 1  |
| <i>Phaseolus vulgaris</i>                             | Fabales      | Fabaceae       | Phavul       | 10.1038/ng.3008              | 1   | 1  |
| <i>Populus trichocarpa</i>                            | Malpighiales | Salicaceae     | Poptri       | 10.1126/science.1128691      | 0   | 1  |
| <i>Potentilla micrantha</i>                           | Rosales      | Rosaceae       | Potmic       | 10.1093/gigascience/giy010   | 0   | 1  |
| <i>Prunus avium</i>                                   | Rosales      | Rosaceae       | Pruavi       | 10.1093/dnares/dsx020        | 0   | 1  |
| <i>Prunus dulcis</i>                                  | Rosales      | Rosaceae       | Prudul       | www.rosaceae.org             | 0   | 1  |
| <i>Prunus mume</i>                                    | Rosales      | Rosaceae       | Prumum       | NCBI                         | 0   | 1  |
| <i>Prunus persica</i>                                 | Rosales      | Rosaceae       | Pruper       | 10.1038/ng.2586              | 0   | 1  |
| <i>Pyrus communis</i>                                 | Rosales      | Rosaceae       | Pyrcom       | 10.1371/journal.pone.0092644 | 0   | 1  |
| <i>Pyrus x bretschneideri</i>                         | Rosales      | Rosaceae       | Pyrbre       | NCBI                         | 0   | 1  |
| <i>Ricinus communis</i>                               | Malpighiales | Euphorbiaceae  | Riccom       | 10.1038/nbt.1674             | 0   | 1  |
| <i>Rosa chinensis</i>                                 | Rosales      | Rosaceae       | Roschi       | 10.1038/s41588-018-0110-3    | 0   | 1  |
| <i>Rubus occidentalis</i>                             | Rosales      | Rosaceae       | Rubocc       | 10.1111/tpj.13215            | 0   | 1  |
| <i>Sclerocarya birrea</i>                             | Sapindales   | Anacardiaceae  | Sclbir       | 10.1093/gigascience/giy152   | 0   | 1  |
| <i>Solanum lycopersicum</i>                           | Solanales    | Solanaceae     | Sollyc       | 10.1038/nature11119          | 0   | 1  |
| <i>Solanum pennellii</i>                              | Solanales    | Solanaceae     | Solpen       | 10.1038/ng.3046              | 0   | 1  |
| <i>Theobroma cacao</i>                                | Malvales     | Malvaceae      | Thecac       | 10.1186/gb-2013-14-6-r53     | 0   | 1  |
| <i>Trema orientalis</i>                               | Rosales      | Cannabaceae    | Treori       | 10.1073/pnas.1721395115      | 0   | 1  |
| <i>Trifolium pratense</i>                             | Fabales      | Fabaceae       | Tripri       | 10.1038/srep17394            | 1   | 1  |
| <i>Trifolium subterraneum</i>                         | Fabales      | Fabaceae       | Trisub       | NCBI                         | 1   | 1  |
| <i>Vigna angularis</i>                                | Fabales      | Fabaceae       | Vigang       | 10.1038/srep080669           | 1   | 1  |
| <i>Vigna radiata</i>                                  | Fabales      | Fabaceae       | Vigrad       | 10.1038/ncomms6443           | 1   | 1  |
| <i>Vigna subterranea</i>                              | Fabales      | Fabaceae       | Vigsub       | 10.1093/gigascience/giy152   | 1   | 1  |
| <i>Vigna unguiculata</i>                              | Fabales      | Fabaceae       | Vigung       | Phytozome                    | 1   | 1  |
| <i>Ziziphus jujuba</i> cv. Dongzao                    | Rosales      | Rhamnaceae     | Zizuj        | 10.1038/ncomms6315           | 0   | 1  |

**Table S2 List of investigated species for promoter analysis. Related to Figure 5.**

### **Supplemental reference**

S1: Lefebvre, B., Klaus-Heisen, D., Pietraszewska-Bogiel, A., Herve, C., Camut, S., Auriac, M.-C., Gascioli, V., Nurisso, A., Gadella, T.W.J., and Cullimore, J. (2012). Role of N-Glycosylation Sites and CXC Motifs in Trafficking of *Medicago truncatula* Nod Factor Perception Protein to Plasma Membrane. *J Biol Chem* 287, 10812-10823.
